# Supplementary material for: Understanding the effect of surfactants’ hydrophobicity on the growth of lanthanum sulfide nanospheres in water-in-oil microemulsions: a detailed dynamic light scattering, small angle X-ray scattering, and microscopy study
Source: Royal Society of Chemistry journal article supplement (doi:10.1039/d3nj00935a), 2023-01-01
Supplement: d3nj00935a1.pdf [file d3nj00935a1.pdf]

## **Electronic Supplementary Information (ESI)**

### **Understanding the effect of surfactants' hydrophobicity on the growth of lanthanum sulfide nanospheres in Water-in-Oil microemulsion: A detailed Dynamic light scattering, Small angle X-ray scattering, and Microscopic study**

Sk Mehebab Rahaman<sup>a</sup>, Anirudh Bardhan<sup>b</sup>, Trishna Mandal<sup>a</sup>, Madhuparna Chakraborty<sup>c</sup>, Kripasindhu Karmakar<sup>a</sup>, Subhendu Dhibar<sup>a</sup>, Shivanjali Sharma<sup>b</sup>, Manab Chakravarty<sup>c</sup>, Samia M. Ibrahim<sup>d</sup>, Bidyut Saha<sup>a\*</sup>

<sup>a</sup>Colloid Chemistry Laboratory, Department of Chemistry, The University of Burdwan, Golapbag, Burdwan-713104, West Bengal, India; [bsaha@chem.buruniv.ac.in](mailto:bsaha@chem.buruniv.ac.in), Tel: +91 9476341691 (B. Saha).

<sup>b</sup>Petroleum Engineering, Rajiv Gandhi Institute of Petroleum Technology, Jais, Amethi, Uttar Pradesh, India.

<sup>c</sup>Department of Chemistry, Birla Institute of Technology & Science, Pilani-Hyderabad Campus, Hyderabad-500078, Telangana, India.

<sup>d</sup>Chemistry Department, Faculty of Science, New Valley University, El-Kharga 72511, New Valley, Egypt.

## **Supplementary Material: Tables**

**Table S1:** Detailed information on the W/O microemulsion preparation procedure.

Water and surfactant (Tween 20 or Tween 80) in a specified [Water]/[Surfactant] ratio ( $W_0 = 10$ ) were placed in a dry beaker with a specific amount of toluene and then put in a digital ultrasonic cleaner and sonicated for 30 sec. The turbid and viscous solution was thereafter titrated with 1-butanol with continuous stirring to attain the optimum clarity. The system was allowed enough to reach equilibrium; turbidity was not re-established after it had vanished. The amount of 1-butanol needed to form a stable microemulsion was estimated. At a fixed temperature of 303 K, the entire procedure was carried out by using Tween 20 as well as Tween 80 as surfactants. Therefore the respective volume percentage of toluene, water, surfactants and 1-butanol for each reverse micellar media are enlisted in the following table:

| W/O microemulsion media                 | Toluene (%) | Water (%) | Surfactants (%) | 1-butanol (%) |
|-----------------------------------------|-------------|-----------|-----------------|---------------|
| <b>Tween 20/1-butanol/toluene/water</b> | 53.14       | 1.06      | 6.57            | 39.21         |
| Tween 80/1-butanol/toluene/water        | 55.23       | 1.10      | 7.21            | 36.45         |

**Table S2:** Comparison of the slope of the Porod plot for the employed microemulsion media to synthesise the lanthanum sulfide nanoparticles.

| W/O microemulsion media                 | Time (min) | Slope |
|-----------------------------------------|------------|-------|
| <b>Tween 20/1-butanol/toluene/water</b> | 15         | 41.80 |
|                                         | 60         | 35.28 |
| Tween 80/1-butanol/toluene/water        | 15         | 49.19 |
|                                         | 60         | 45.23 |

## Supplementary Material: Figures

**Fig S1:**

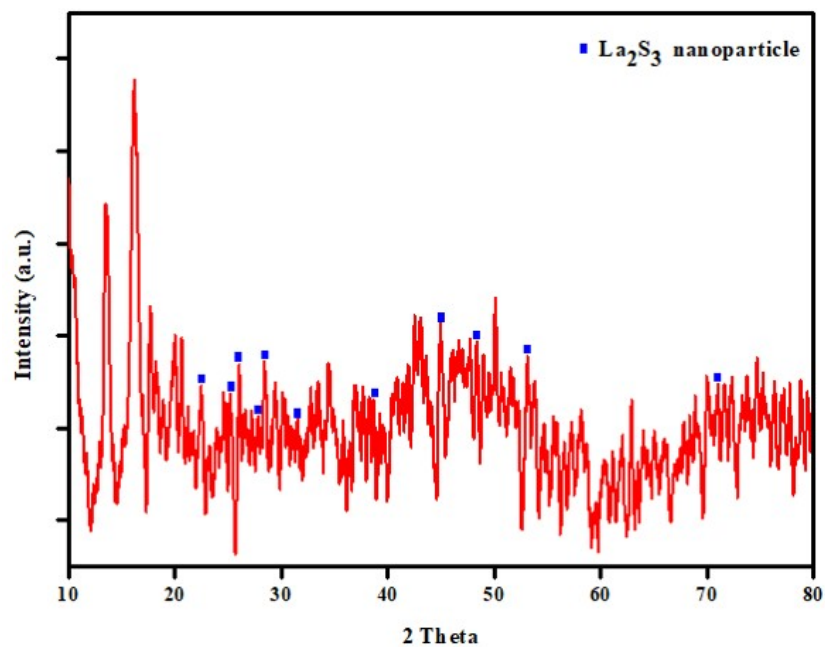

**Fig S1.** PXRD patterns of lanthanum sulfide nanospheres (synthesised from microemulsion, Tween 20/1-butanol/Toluene/lanthanum sulfide) at room temperature.

**Fig S2:**

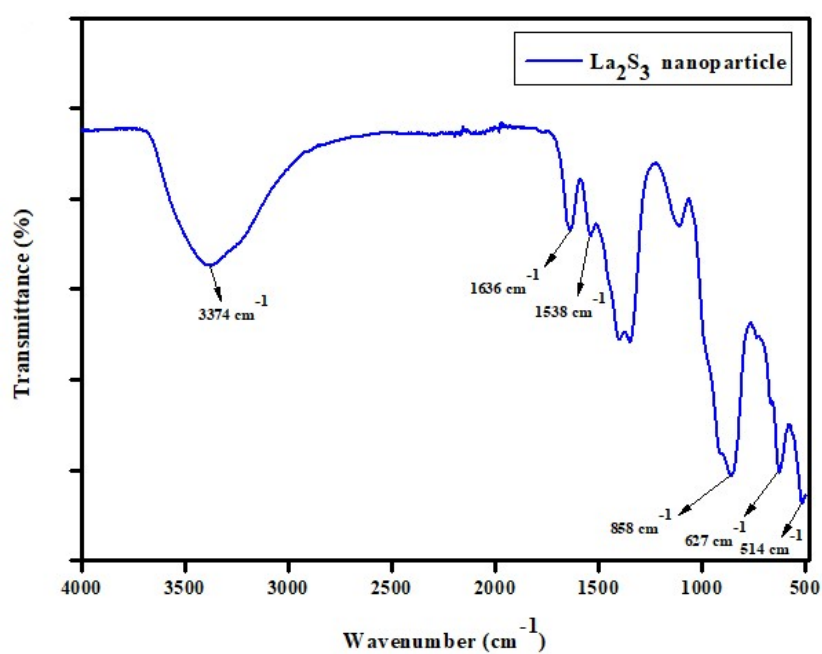

**Fig S2.** IR spectrum of lanthanum sulfide nanospheres (synthesised from microemulsion, Tween 20/1-butanol/Toluene/lanthanum sulfide) at room temperatures.

**Fig S3:**

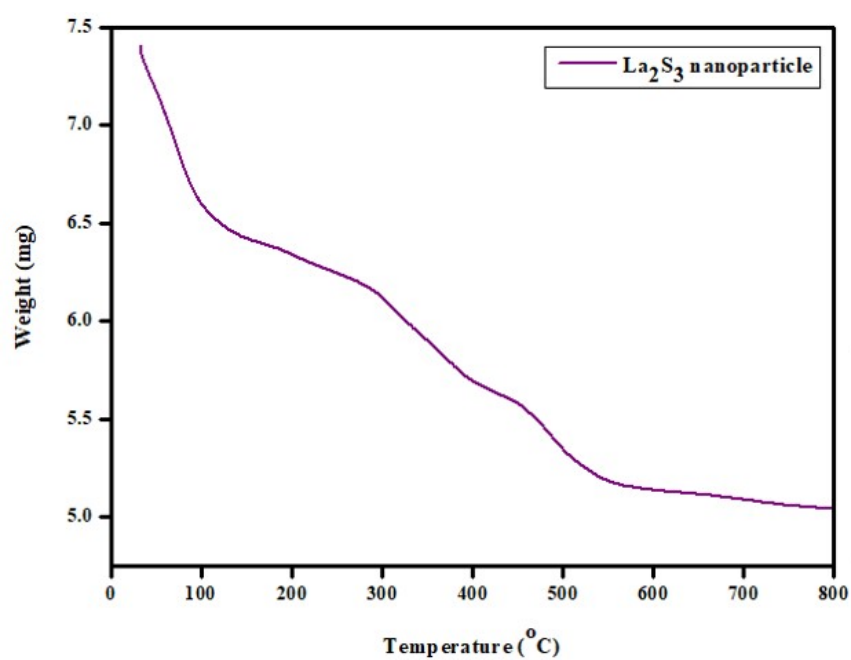

**Fig S3.** TGA curve of lanthanum sulfide nanospheres (synthesised from microemulsion, Tween 20/1-butanol/Toluene/lanthanum sulfide) at room temperatures.

**Fig S4:**

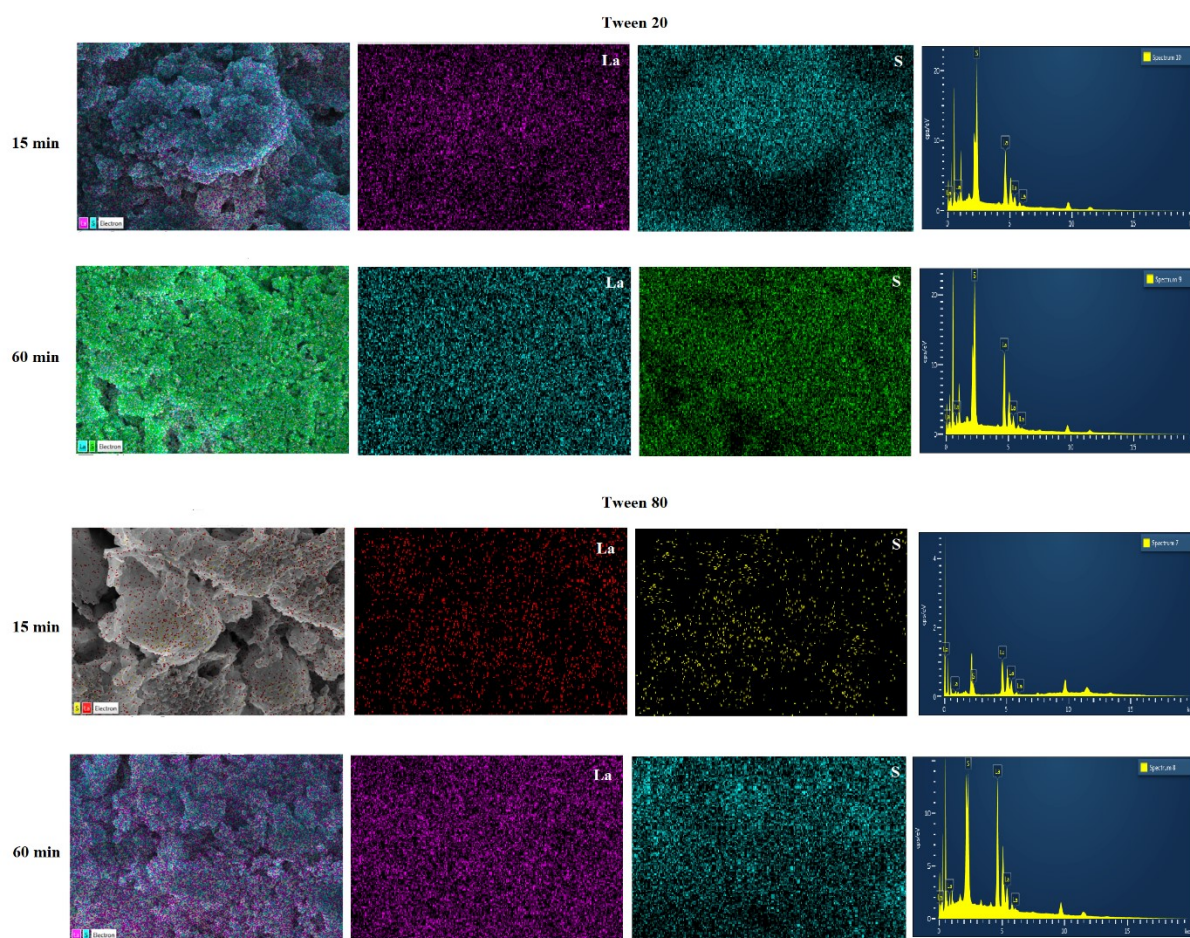

**Fig S4.** EDX patterns and electron mapping of lanthanum sulfide nanoparticles (synthesised from the microemulsion media composed by Tween 20 and Tween 80) at room temperatures after 15 and 60 min of the reaction.

**Fig S5:**

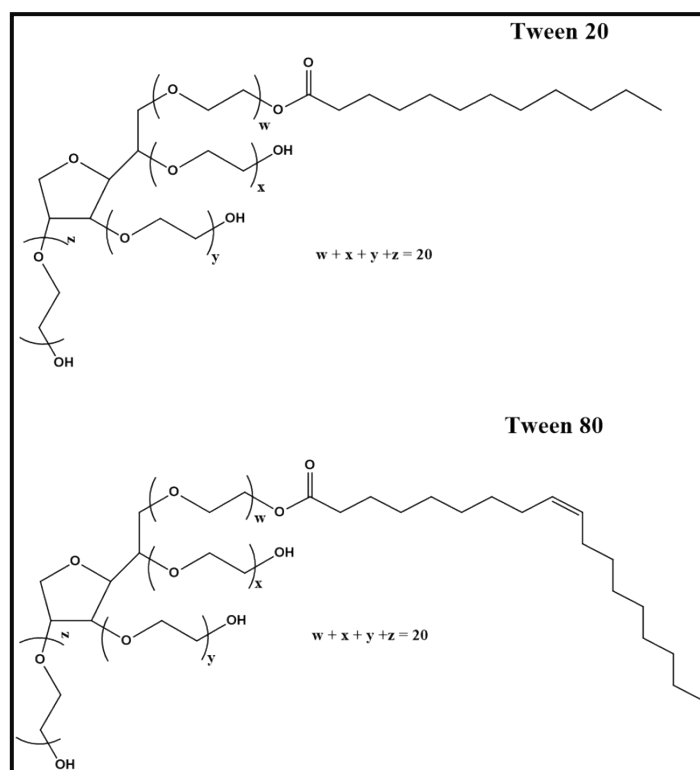

**Fig S5.** Structure of Tween 20 (have not any pi bond) and Tween 80 (showing the presence of  $\pi$ -bond at the hydrophobic tail).

**Fig S6:**

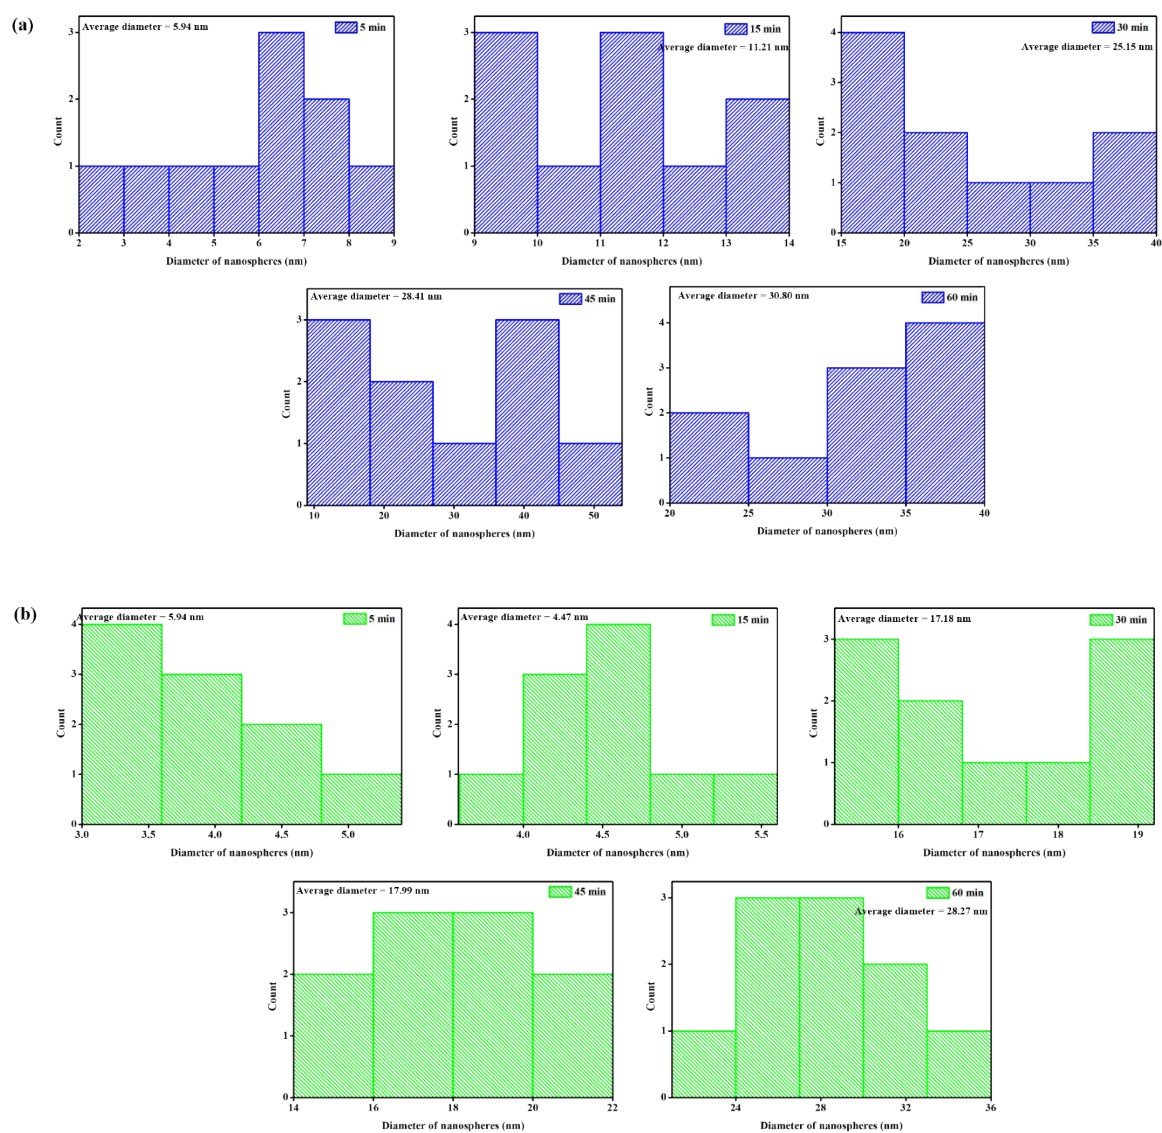

**Fig S6.** Particle size distribution of lanthanum sulfide nanospheres obtained from TEM analysis, at different time intervals, synthesised from the reverse micellar media constituted by (a) Tween 20 and (b) Tween 80.

**Fig S7:**

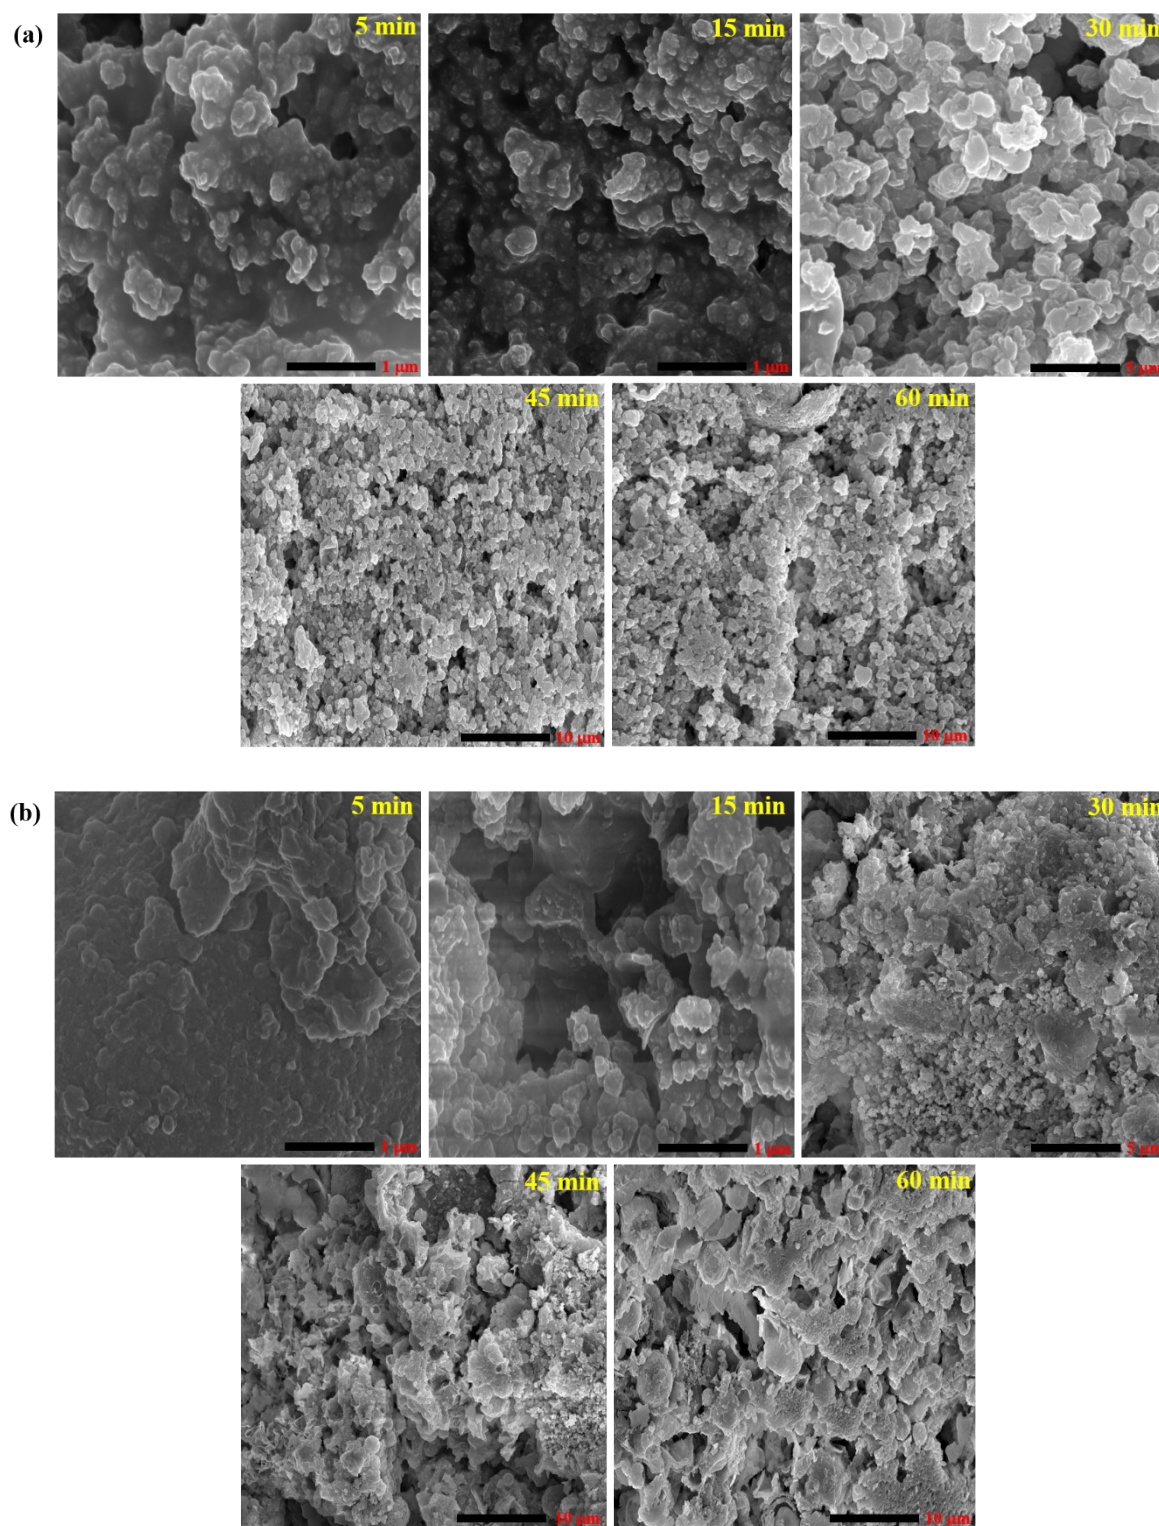

**Fig S7.** FESEM images of lanthanum sulfide nanoparticles at different time intervals, synthesised from the reverse micellar media constituted by (a) Tween 20 and (b) Tween 80.
